# Supplementary material
Source: MDPI journal article supplement (https://www.mdpi.com/2311-7524/9/8/946)
Supplement: s1 [file s1]

## Supplementary Materials

**Table S1.** Quantities of the substances 2-phenylethylalcohol, nerol, citronellol, geraniol, nonadecane and (citronellol + nerol) / geraniol detected with GC-MS in the flower petal extracts of the nine genotypes of *R. damascena* from Greece.

| Genotype | 2-phenylethylalcohol<br>( $\mu\text{g/g}$ ) | Nerol<br>( $\mu\text{g/g}$ ) | Citronellol<br>( $\mu\text{g/g}$ ) | Geraniol<br>( $\mu\text{g/g}$ ) | Nonadecane<br>( $\mu\text{g/g}$ ) | (Citronellol + Nerol)/<br>Geraniol ( $\mu\text{g/g}$ ) |
|----------|---------------------------------------------|------------------------------|------------------------------------|---------------------------------|-----------------------------------|--------------------------------------------------------|
| KS1      | 1170.28 $\pm$ 191.66* d**                   | 27.66 $\pm$ 8.02* c**        | 103.51 $\pm$ 12.90* b**            | 75.80 $\pm$ 13.50* c**          | 300.99 $\pm$ 22.83* cd**          | 1.73                                                   |
| KZ1      | 2358.48 $\pm$ 50+.63 ab                     | 52.26 $\pm$ 12.37 ab         | 199.63 $\pm$ 40.70 a               | 134.27 $\pm$ 27.07 ab           | 533.15 $\pm$ 42.64 a              | 1.88                                                   |
| KZ2      | 1378.65 $\pm$ 327.47 d                      | 28.69 $\pm$ 4.43 c           | 88.45 $\pm$ 13.85 b                | 99.18 $\pm$ 18.88 bc            | 278.98 $\pm$ 28.76 cd             | 1.18                                                   |
| KS2      | 2257.01 $\pm$ 482.11 ab                     | 43.97 $\pm$ 10.27 bc         | 188.39 $\pm$ 48.71 a               | 124.78 $\pm$ 30.28 ab           | 485.25 $\pm$ 49.41 ab             | 1.86                                                   |
| KZ3      | 1680.72 $\pm$ 365.35 cd                     | 44.66 $\pm$ 10.30 bc         | 109.73 $\pm$ 25.18 b               | 130.26 $\pm$ 28.10 ab           | 287.39 $\pm$ 28.13 cd             | 1.19                                                   |
| GR1      | 2402.85 $\pm$ 558.42 ab                     | 54.99 $\pm$ 12.98 ab         | 205.45 $\pm$ 50.31 a               | 133.03 $\pm$ 38.64 ab           | 470.25 $\pm$ 49.81 ab             | 1.96                                                   |
| KS3      | 1148.35 $\pm$ 166.29 d                      | 27.45 $\pm$ 2.17 c           | 92.97 $\pm$ 6.69 b                 | 69.12 $\pm$ 6.46 c              | 209.27 $\pm$ 22.68 d              | 1.74                                                   |
| KZ6      | 2777.19 $\pm$ 639.02 a                      | 64.93 $\pm$ 8.02 a           | 206.59 $\pm$ 52.26 a               | 170.99 $\pm$ 60.83 a            | 501.82 $\pm$ 46.54 ab             | 1.59                                                   |
| KS4      | 2070.29 $\pm$ 305.15 bc                     | 57.61 $\pm$ 22.37 ab         | 163.70 $\pm$ 27.93 a               | 150.85 $\pm$ 49.78 a            | 389.06 $\pm$ 39.93 bc             | 1.47                                                   |

\* Mean  $\pm$  standard deviation.

\*\* Means with different letters within a column are statistically significantly different according to Duncan's multiple range test ( $p < 0.05$ ,  $n = 5$ ).

**Table S2.** Quantities of the substances gallic acid, quercetin and kaempferol ( $\mu\text{g/g}$  of fresh petals) detected with LC-MS in the flower petal extracts of the nine genotypes of *R. damascena* from Greece.

| Genotype | Gallic acid<br>( $\mu\text{g/g}$ ) | Quercetin<br>( $\mu\text{g/g}$ ) | Kaempferol<br>( $\mu\text{g/g}$ ) |
|----------|------------------------------------|----------------------------------|-----------------------------------|
| KS1      | $0.29 \pm 0.03^* \text{ c}^{**}$   | $0.37 \pm 0.02^* \text{ d}^{**}$ | $0.31 \pm 0.02^* \text{ c}^{**}$  |
| KZ1      | $0.32 \pm 0.02 \text{ c}$          | $0.53 \pm 0.02 \text{ c}$        | $0.34 \pm 0.03 \text{ c}$         |
| KZ2      | $0.32 \pm 0.04 \text{ c}$          | $0.50 \pm 0.10 \text{ c}$        | $0.29 \pm 0.02 \text{ c}$         |
| KS2      | $0.28 \pm 0.04 \text{ c}$          | $0.42 \pm 0.04 \text{ cd}$       | $0.35 \pm 0.04 \text{ c}$         |
| KZ3      | $0.32 \pm 0.05 \text{ c}$          | $0.49 \pm 0.02 \text{ c}$        | $0.27 \pm 0.05 \text{ c}$         |
| GR1      | $0.82 \pm 0.09 \text{ a}$          | $1.17 \pm 0.18 \text{ a}$        | $2.13 \pm 0.20 \text{ a}$         |
| KS3      | $0.31 \pm 0.04 \text{ c}$          | $0.46 \pm 0.08 \text{ c}$        | $0.26 \pm 0.04 \text{ c}$         |
| KZ6      | $0.63 \pm 0.05 \text{ b}$          | $0.82 \pm 0.05 \text{ b}$        | $0.80 \pm 0.07 \text{ b}$         |
| KS4      | $0.30 \pm 0.03 \text{ c}$          | $0.36 \pm 0.04 \text{ d}$        | $0.32 \pm 0.03 \text{ c}$         |

\* Mean  $\pm$  standard deviation.

\*\* Means with different letters within a column are statistically significantly different according to Duncan's multiple range test ( $p < 0.05$ ,  $n=5$ ).
